# Supplementary material for: Design and preparation of pyrrole-based spin-polarized donorsElectronic supplementary information (ESI) available: cyclic voltammograms for N-PN, β-PN, N-TPN, PhNN and TPP. See http://www.rsc.org/suppdata/jm/b2/b211986b/
Source: Royal Society of Chemistry journal article supplement (doi:10.1039/b211986b), 2003-03-10

**Supporting Information**

Design and preparation of pyrrole-based spin-polarized donors

Jotaro Nakazakia, InGwon Chunga, Michio M. Matsushitaa, Tadashi Sugawara*,a,

Ryoji Watanabeb, Akira Izuokab and Yuzo Kawadab

a *Department of Basic Science, Graduate School of Arts and Sciences, The University of Tokyo,*

*Komaba, Meguro, Tokyo 153-8902, Japan.*

b *Department of Materials and Biological Sciences, Faculty of Science, Ibaraki University,*

*Bunkyo, Mito, Ibaraki 310-8512, Japan.*

**Cyclic voltammograms of compounds in Table 2.**

Cyclic voltammograms were recorded at room temperature in benzonitrile solution in the presence of 0.1 M tetra-*n*-butylammonium perchlorate (Nacalai Tesque Inc.) as a supporting electrolyte with a platinum working electrode, using a Hokuto Denko HAB 151 potentiostat/galvanostat. An Ag/AgCl electrode (BAS Co.) was used for a reference electrode. Scanning rate was 200 mV/s.


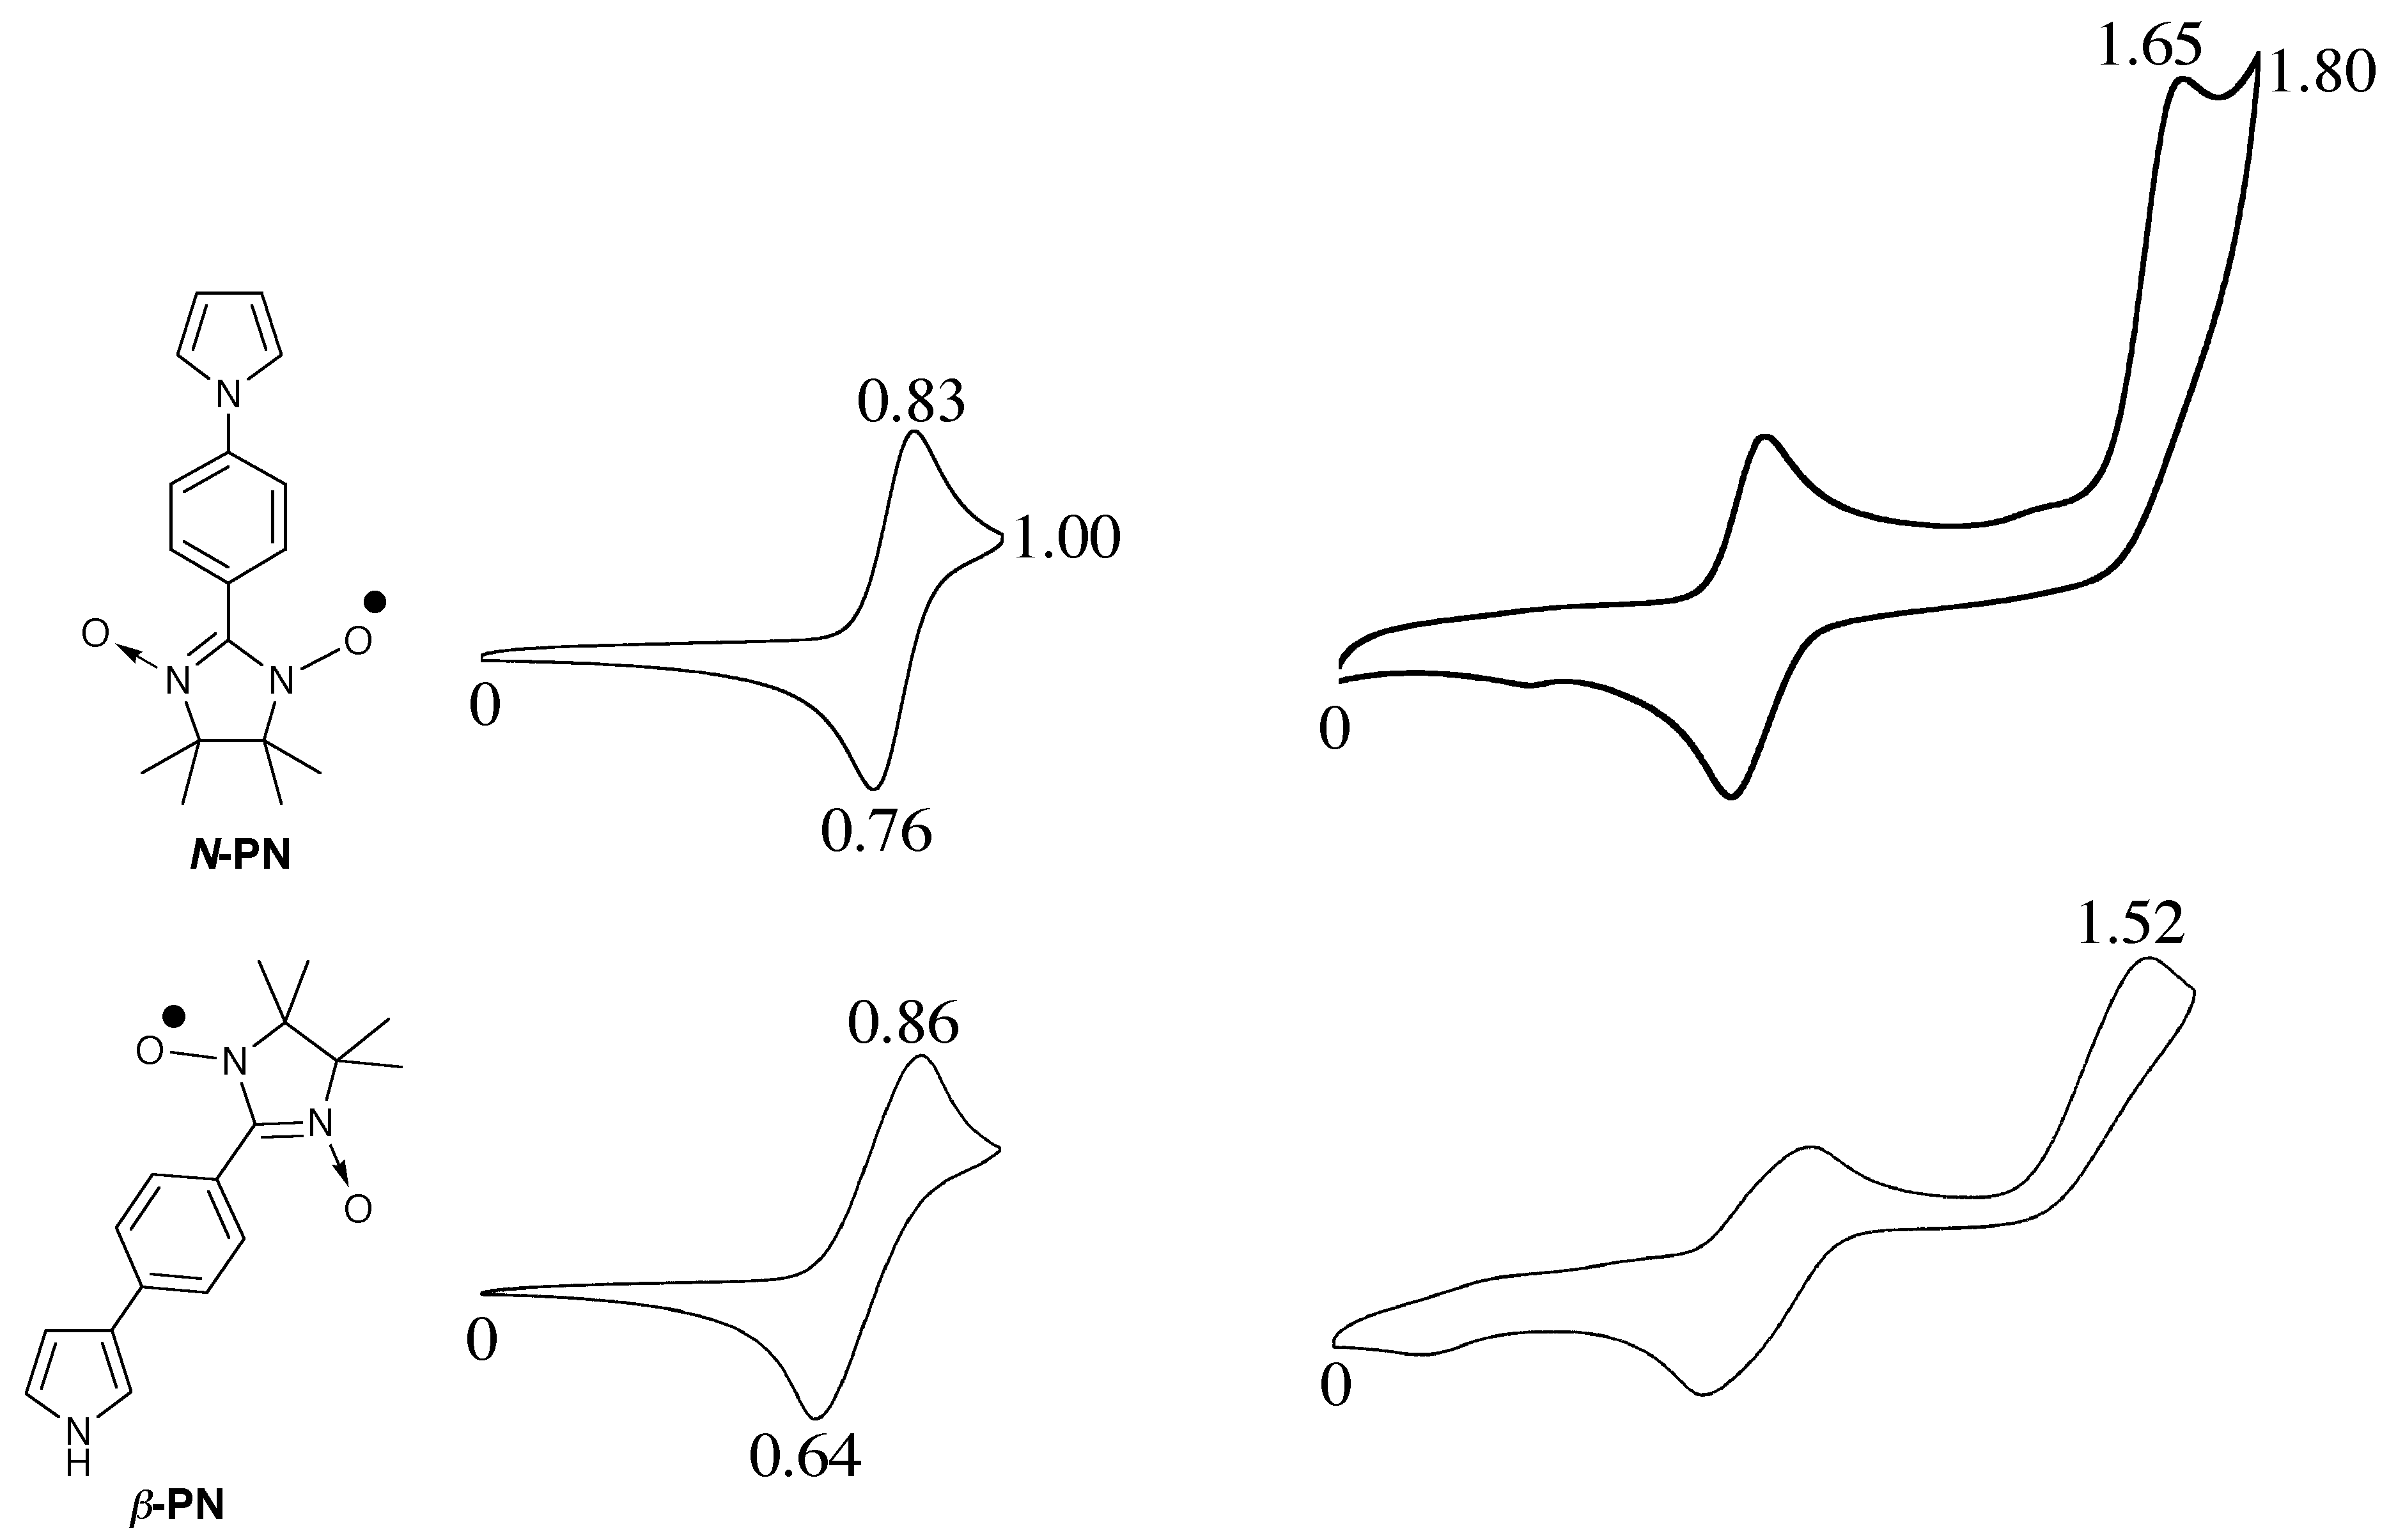


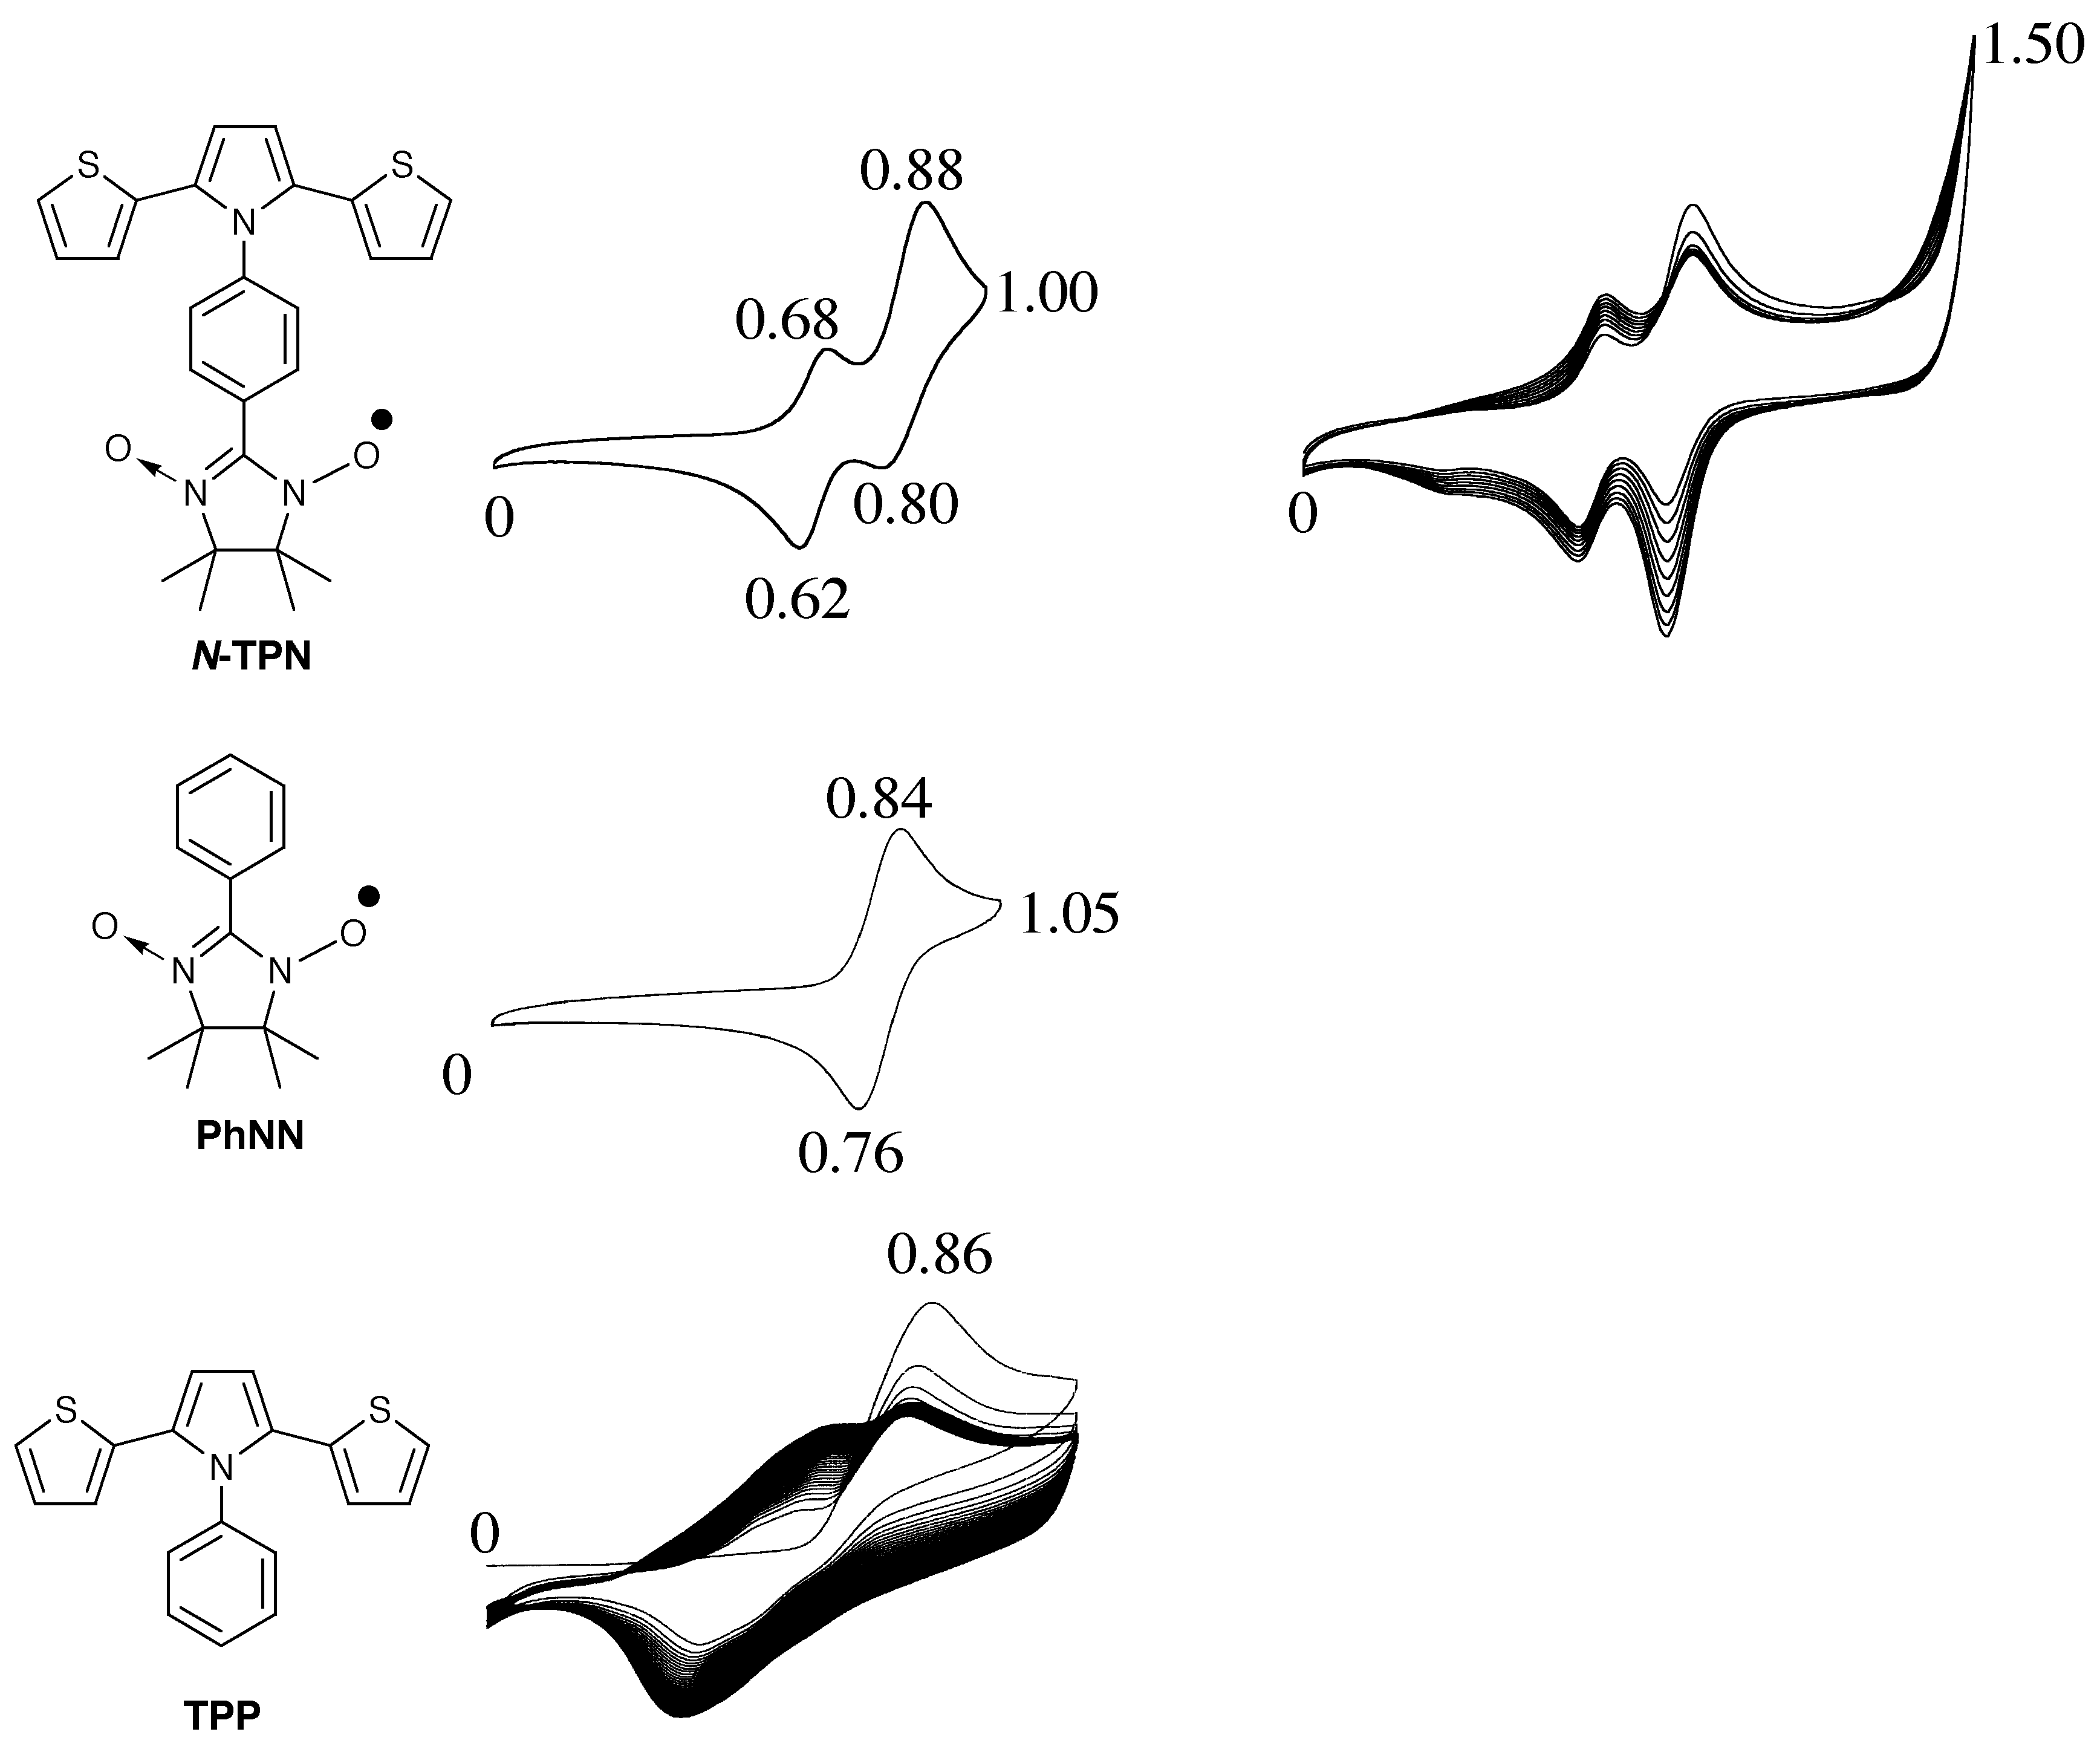

Supplement: b211986b.doc [file b211986b.doc]
